# Supplementary material for: Associations between COVID-19-Related Digital Health Literacy and Online Information-Seeking Behavior among Portuguese University Students
Source: MDPI journal article supplement (doi:10.3390/ijerph17238987), 2020-12-02
Supplement: s1 [file s1]

Supplementary table Associations between sources of information and DHL related with COVID-19

|                                                   | DHL related with COVID-19<br>OR (95%CI) |                               |                        |                       |
|---------------------------------------------------|-----------------------------------------|-------------------------------|------------------------|-----------------------|
|                                                   | Information Searching                   | Adding self-generated content | Evaluating reliability | Determining relevance |
| Weeks of data collection                          |                                         |                               |                        |                       |
| Week 1                                            | ref                                     | ref                           | ref                    | ref                   |
| Week 2                                            | 1.0 (0.7; 1.2)                          | 1.0 (0.8; 1.4)                | 0.9 (0.7; 1.1)         | 1.0 (0.8; 1.3)        |
| Week 3 and 4                                      | 0.7 (0.5; 1.1)                          | 0.8 (0.5; 1.3)                | 0.7 (0.5; 1.1)         | 1.0 (0.7; 1.6)        |
| Week 5 and 6                                      | 1.1 (0.9; 1.4)                          | 0.9 (0.7; 1.2)                | 0.9 (0.7; 1.1)         | 0.8 (0.6; 1.0)        |
| Subjective social status                          | 1.2 (1.0; 1.4)                          | 1.2 (1.0; 1.5)                | 1.2 (1.0; 1.4)         | <b>1.3 (1.1; 1.5)</b> |
| Search engines (eg. Google, Bing, Yahoo!)         | <b>0.7 (0.5; 0.9)</b>                   | 0.8 (0.6; 1.1)                | 0.8 (0.6; 1.1)         | 0.8 (0.6; 1.1)        |
| Websites of public bodies                         | 1.4 (0.9; 2.1)                          | 1.4 (0.9; 2.3)                | <b>1.7 (1.1; 2.5)</b>  | <b>1.7 (1.1; 2.5)</b> |
| Wikipedia and other online-encyclopaedias         | 0.8 (0.7; 1.0)                          | 0.9 (0.7; 1.1)                | <b>0.7 (0.6; 0.9)</b>  | <b>0.7 (0.6; 0.9)</b> |
| Social media (eg. Facebook, Instagram, Twitter)   | <b>0.7 (0.6; 0.9)</b>                   | 0.8 (0.7; 1.0)                | <b>0.7 (0.6; 0.8)</b>  | 0.9 (0.7; 1.1)        |
| YouTube                                           | 1.0 (0.8; 1.2)                          | 1.0 (0.8; 1.3)                | 0.9 (0.7; 1.1)         | 1.0 (0.8; 1.2)        |
| Blogs on health topics                            | 0.9 (0.7; 1.2)                          | 1.0 (0.8; 1.3)                | 0.9 (0.7; 1.1)         | 0.9 (0.7; 1.1)        |
| Guidebook-communities (eg. SNS-24)                | 1.1 (0.8; 1.3)                          | 1.1 (0.8; 1.4)                | 0.8 (0.7; 1.1)         | 1.0 (0.8; 1.2)        |
| Health portals                                    | 1.0 (0.8; 1.2)                          | 1.1 (0.9; 1.4)                | <b>1.3 (1.0; 1.5)</b>  | 1.1 (0.9; 1.4)        |
| Websites of doctors or health insurance companies | 1.0 (0.8; 1.3)                          | 1.1 (0.9; 1.4)                | 1.1 (0.9; 1.3)         | 1.1 (0.9; 1.4)        |
| News portals (eg. of newspapers, TV stations)     | 1.0 (0.8; 1.4)                          | 1.0 (0.8; 1.4)                | 1.2 (0.9; 1.5)         | 1.1 (0.9; 1.5)        |

Unadjusted results from binary logistic regression *Odds ratio* (Confidence Interval).

Bold p<0.05
